# Supplementary material for: Alternative mRNA Splicing in Three Venom Families Underlying a Possible Production of Divergent Venom Proteins of the Habu Snake, Protobothrops flavoviridis
Source: PubMed Central journal article supplement (PMC6832531; doi:10.3390/toxins11100581), 2019-10-09
Supplement: toxins-11-00581-s001.pdf [file toxins-11-00581-s001.pdf]

# Supplementary Materials: Alternative mRNA Splicing in Three Venom Families Underlying a Possible Production of Divergent Venom Proteins of the Habu Snake, *Protobothrops flavoviridis*

Tomohisa Ogawa, Naoko Oda-Ueda, Kanako Hisata, Hitomi Nakamura, Takahito Chijiwa, Shousaku Hattori, Akiko Isomoto, Haruki Yugeta, Shinichi Yamasaki, Yasuyuki Fukumaki, Motonori Ohno, Noriyuki Satoh and Hiroki Shibata

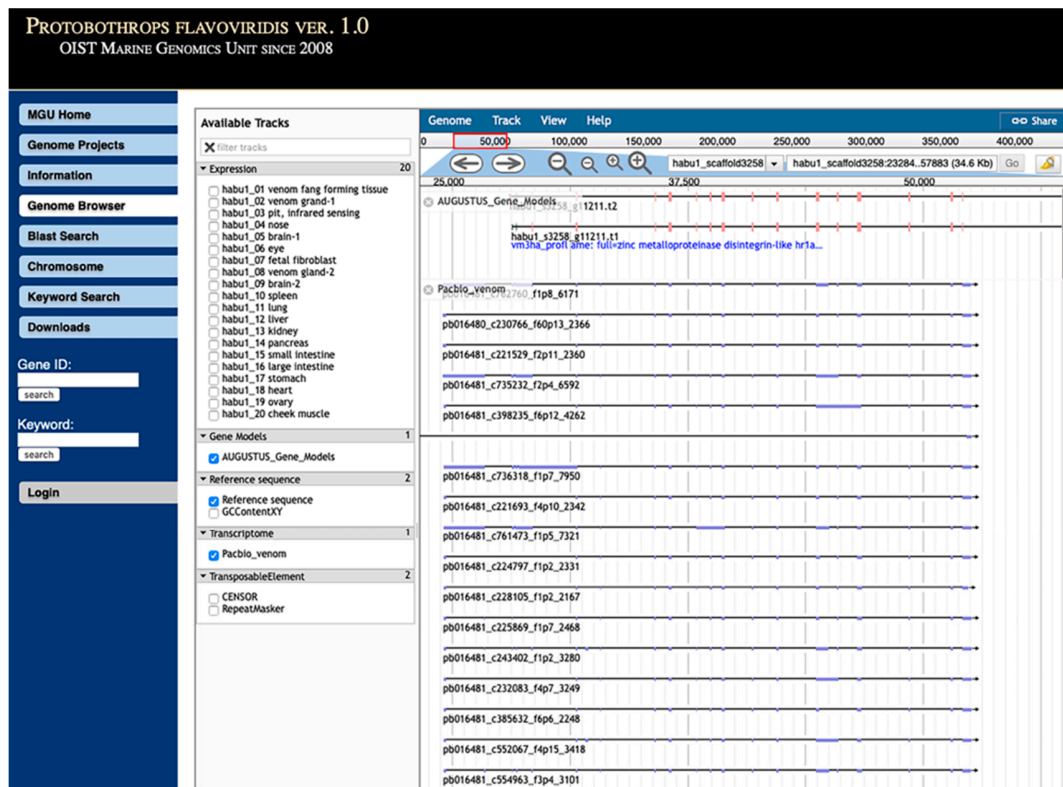

Figure S1. Representative example of Augustus Gene model, *svMP05\_HR1a*, with partial Pacbio transcript data.

Table S1. Metalloproteinase (MP) genes and representative transcripts expressed in the habu venom glands.

| Gene   | Name                                     | Gene Model ID        | Transcripts (IsoSeq Reads)     | No. of Transcript Valiants in Venom Gland |
|--------|------------------------------------------|----------------------|--------------------------------|-------------------------------------------|
| svMP01 | HV1, Vascular apoptosis-inducing protein | habu1_s2862_g10314 a | pb016480_c42639_f26p8_2<br>346 | 6                                         |
|        |                                          |                      | pb016481_c232850_f1p14_2554    |                                           |
|        |                                          |                      | pb016481_c414810_f1p10_2224    |                                           |

|        |                 |                         |                                                                                                                                                                                                                                             |    |
|--------|-----------------|-------------------------|---------------------------------------------------------------------------------------------------------------------------------------------------------------------------------------------------------------------------------------------|----|
|        |                 |                         | pb016481_c226062_f1p7_2<br>212<br>pb016481_c752203_f1p11_<br>7361<br>pb016481_c228853_f1p2_2<br>147                                                                                                                                         |    |
| svMP02 | flavorase       | habu1_s2862_g10314<br>b | pb016480_c42674_f12p2_2<br>354<br>pb016481_c222143_f4p19_<br>2794<br>pb016480_c250326_f1p0_3<br>778<br>pb016481_c222615_f5p4_2<br>265<br>pb016481_c256167_f6p4_2<br>038<br>pb016481_c258735_f1p9_2<br>479<br>pb016481_c410155_f1p8_5<br>215 | 7  |
| svMP03 | VMP-III -like   | habu1_s2862_g10314<br>c | pb016481_c734840_f87p35<br>_2366 pb016481_<br>c414110_f1p21_2536<br>pb016481_c391324_f1p7_2<br>138                                                                                                                                          | 3  |
| svMP04 | jerdonitin-like | habu1_s3258_g11210      | pb016481_c222387_f3p5_2<br>004<br>pb016480_c233699_f1p1_1<br>828<br>pb016480_c230845_f9p5_6<br>405<br>pb016480_c82997_f1p2_18<br>88<br>pb016480_c762_f8p5_1452<br>pb016481_c393071_f2p3_3<br>717                                            | 6  |
| svMP05 | HR1a            | habu1_s3258_g11211      | pb016480_c385632_f6p6_2<br>248<br>pb016480_c180398_f1p4_2<br>640<br>pb016480_c115296_f1p1_2<br>355<br>pb016480_c571407_f1p13_<br>3809<br>pb016481_c225869_f1p7_2<br>468<br>pb016481_c213417_f2p3_2<br>140                                   | 18 |

|        |                                              |                      |                              |    |
|--------|----------------------------------------------|----------------------|------------------------------|----|
|        |                                              |                      | pb016481_c224762_f1p4_2384   |    |
|        |                                              |                      | pb016480_c51356_f1p0_1633    |    |
|        |                                              |                      | pb016481_c397883_f1p10_3413  |    |
|        |                                              |                      | pb016481_c573285_f1p11_2295  |    |
|        |                                              |                      | pb016481_c416405_f2p2_3343   |    |
|        |                                              |                      | pb016480_c46823_f3p11_2793   |    |
|        |                                              |                      | pb016481_c552067_f4p15_3418  |    |
|        |                                              |                      | pb016481_c398235_f6p12_4262  |    |
|        |                                              |                      | pb016481_c735002_f9p14_6755  |    |
|        |                                              |                      | pb016481_c232083_f4p7_3249   |    |
|        |                                              |                      | pb016480_c298560_f3p10_6743  |    |
|        |                                              |                      | pb016481_c761473_f1p5_7321   |    |
| svMP06 | H2 metalloproteinase (metalloprotease P-Iia) | habu1_s14911_g21429  | pb016481_c225249_f1p9_1815   | 2  |
|        |                                              |                      | pb016480_c164899_f9p15_3671  |    |
|        |                                              |                      | pb016480_c226_f26p9_2010     |    |
|        |                                              |                      | pb016481_c412727_f2p12_1989  |    |
|        |                                              |                      | pb016481_c552023_f10p36_4003 |    |
|        |                                              |                      | pb016480_c230957_f2p12_3969  |    |
| svMP07 | HR2a                                         | habu1_s14911_g21430a | pb016481_c222038_f23p8_2094  | 13 |
|        |                                              |                      | pb016481_c410202_f2p6_4970   |    |
|        |                                              |                      | pb016480_c182477_f1p6_4962   |    |
|        |                                              |                      | pb016481_c569924_f3p28_4139  |    |
|        |                                              |                      | pb016481_c735029_f6p24_6129  |    |
|        |                                              |                      | pb016480_c301942_f1p9_7082   |    |

|        |            |                           |                                    |    |
|--------|------------|---------------------------|------------------------------------|----|
|        |            |                           | pb016480_c92848_f1p2_11<br>57      |    |
|        |            |                           | pb016480_c181237_f1p2_4<br>088     |    |
|        |            |                           | /pb016480_c164930_f2p0_<br>4266    |    |
|        |            |                           | pb016480_c222_f46p26_19<br>97      |    |
|        |            |                           | pb016481_c734849_f1820p<br>63_1998 |    |
|        |            |                           | pb016481_c222359_f4p23_<br>2219    |    |
|        |            |                           | pb016481_c222126_f12p24<br>_3060   |    |
|        |            |                           | pb016480_c9689_f1p6_190<br>5       |    |
|        |            |                           | pb016480_c359165_f2p11_<br>1737    |    |
|        |            |                           | pb016481_c80731_f1p5_14<br>84      |    |
|        |            |                           | pb016481_c557711_f1p8_1<br>601     |    |
| svMP08 | flavoridin | habu1_s14911_g2143<br>0b  | pb016481_c222549_f3p4_2<br>038     | 17 |
|        |            |                           | pb016481_c222077_f17p8_<br>3057    |    |
|        |            |                           | pb016481_c552171_f2p7_3<br>985     |    |
|        |            |                           | pb016481_c740798_f1p7_5<br>424     |    |
|        |            |                           | pb016481_c576234_f1p8_3<br>948     |    |
|        |            |                           | pb016481_c417811_f8p12_<br>4120    |    |
|        |            |                           | pb016481_c589782_f1p11_<br>3503    |    |
|        |            |                           | pb016481_c394718_f2p10_<br>2465    |    |
|        |            |                           | pb016481_c585605_f1p3_3<br>986     |    |
|        |            |                           | pb016481_c917376_f5p9_2<br>037     |    |
|        |            |                           | pb016481_c228750_f1p2_2<br>017     |    |
| svMP09 | HR1b       | habu1_s399953_g248<br>64a | pb016481_c415369_f1p4_2<br>324     | 6  |
|        |            |                           | pb016481_c222397_f4p4_2<br>395     |    |
|        |            |                           | pb016481_c568766_f1p6_4            |    |

|        |                         |                           |                                                                  |   |
|--------|-------------------------|---------------------------|------------------------------------------------------------------|---|
|        |                         |                           | 063<br>pb016481_c559926_f1p7_4<br>374                            |   |
| svMP10 | Mt-b/<br>elegantin-like | habu1_s399953_g248<br>64b | pb016481_c16287_f13p13_<br>2020<br>pb016480_c97939_f1p3_18<br>45 | 2 |
| svMP11 | NaMP                    | habu1_s2862_g10314<br>d   | habu1_s2862_g10314.t2                                            | 1 |

**Table S2.** Serine protease (SP) genes and representative transcripts expressed in the habu venom glands.

| Gene   | Name                | Gene Model ID           | Transcripts<br>(Representative Site)                                                                                                                                                                                           | No. of<br>Transcript<br>Valiants in<br>Venom Gland |
|--------|---------------------|-------------------------|--------------------------------------------------------------------------------------------------------------------------------------------------------------------------------------------------------------------------------|----------------------------------------------------|
| svSP01 | TLf1/flavoxobi<br>n | habu1_s7597_g18190<br>a | pb016481_c628_f19p22_189<br>7 pb016481_c809_f3p8_1564<br>pb016481_c386030_f8p29_3<br>626<br>pb016481_c410809_f2p9_40<br>11<br>pb016481_c402832_f1p16_3<br>015 pb016481_<br>c581593_f1p4_3745<br>pb016481_<br>c768983_f1p7_7228 | 7                                                  |
| svSP02 | TLf2                |                         | pb016481_<br>c578021_f1p16_2130<br>pb016481_<br>c240059_f1p15_2688<br>pb016481_<br>c53649_f1p1_1022<br>pb016481_<br>c1002973_f1p2_969<br>pb016481_c79772_f1p2_185<br>pb016481_<br>c735101_f3p4_5942                            | 6                                                  |
| svSP03 | TLf3                | habu1_s7597_g18190<br>b | pb016481_<br>c254265_f2p2_2454<br>pb016480_<br>c578021_f1p16_2130<br>pb016481_c663_f11p12_157<br>8 pb016481_<br>c746_f5p6_1124 pb016481_<br>c552114_f3p6_3482<br>pb016480_<br>c424167_f1p1_3699                                | 6                                                  |

|        |                         |                                                                                                                                                                                                                                                                                                |   |
|--------|-------------------------|------------------------------------------------------------------------------------------------------------------------------------------------------------------------------------------------------------------------------------------------------------------------------------------------|---|
| svSP04 | habu1_s6789_g17480      | <p>pb016480_<br/>c54903_f1p3_2873<br/>pb016481_<br/>c389086_f1p3_2991<br/>pb016481_c222250_f5p18_2<br/>824 pb016481_<br/>c401044_f1p7_2131<br/>pb016481_<br/>c249172_f1p8_3106<br/>pb016481_<br/>c185672_f1p0_2196<br/>pb016481_c575210_f1p3_38<br/>45<br/>pb016480_c167245_f1p2_39<br/>15</p> | 8 |
| svSP05 | habu1_s6789_g17481<br>a | <p>pb016480_c5437_f4p4_1540<br/>pb016480_c639_f14p4_1553<br/>pb016481_c237569_f1p19_1<br/>959<br/>pb016481_c720_f4p14_1676<br/>pb016481_c79772_f1p2_185<br/>1<br/>pb016481_c422554_f7p13_3<br/>481</p>                                                                                         | 6 |
| svSP06 | habu1_s4106_g13431<br>a | <p>pb016481_c782298_f2p3_62<br/>39<br/>pb016481_c222442_f2p0_26<br/>03<br/>pb016481_c3562_f3p0_1298<br/>pb016481_c734984_f12p12_<br/>6638<br/>pb016480_c230851_f5p19_8<br/>340<br/>pb016481_c579606_f1p14_5<br/>087<br/>pb016480_c124259_f1p4_26<br/>64</p>                                    | 7 |
| svSP07 | habu1_s4106_g13431<br>b | <p>pb016481_c395211_f1p12_2<br/>348<br/>pb016481_c10307_f1p3_173<br/>3<br/>pb016480_c51061_f1p2_188<br/>6<br/>pb016481_c9384_f1p12_122<br/>6<br/>pb016481_c241758_f2p27_2<br/>330<br/>pb016481_c244787_f3p7_23</p>                                                                             | 9 |

|        |                               |                         |                                                                                                          |   |
|--------|-------------------------------|-------------------------|----------------------------------------------------------------------------------------------------------|---|
|        |                               |                         | 21<br>pb016481_c423385_f1p9_42<br>52<br>pb016481_c576381_f1p1_43<br>16<br>pb016481_c575991_f1p3_52<br>33 |   |
| svSP08 |                               | habu1_s6789_g17481<br>b | pb016481_c1327_f9p6_1578<br>pb016481_c572213_f1p3_11<br>14<br>pb016481_c89829_f1p1_125<br>2              | 3 |
| svSP09 |                               | habu1_s7597_g18190<br>c | pb016481_c243922_f1p5_26<br>91<br>pb016481_c223329_f2p3_19<br>02<br>pb016481_c1003251_f1p1_8<br>15       | 3 |
| svSP10 |                               | habu1_s4106_g13432      | pb016481_c944_f4p2_1299<br>pb016481_c735101_f3p4_59<br>42<br>pb016481_c750442_f1p4_62<br>80              | 3 |
| svSP11 | Jerdonobin-II<br>like, GPV-PA | habu1_s22023_g2246<br>9 | pb016481_c240059_f1p15_2<br>688<br>pb016480_c344_f6p31_1937<br>pb016481_c552365_f2p5_35<br>47            | 3 |
